# Supplementary material
Source: Springer Nature journal article supplement (https://www.springermedizin.de/resource/supplementary/12914_2008_68_MOESM1_ESM.pdf/9537450)

Reasons for justifying IPV

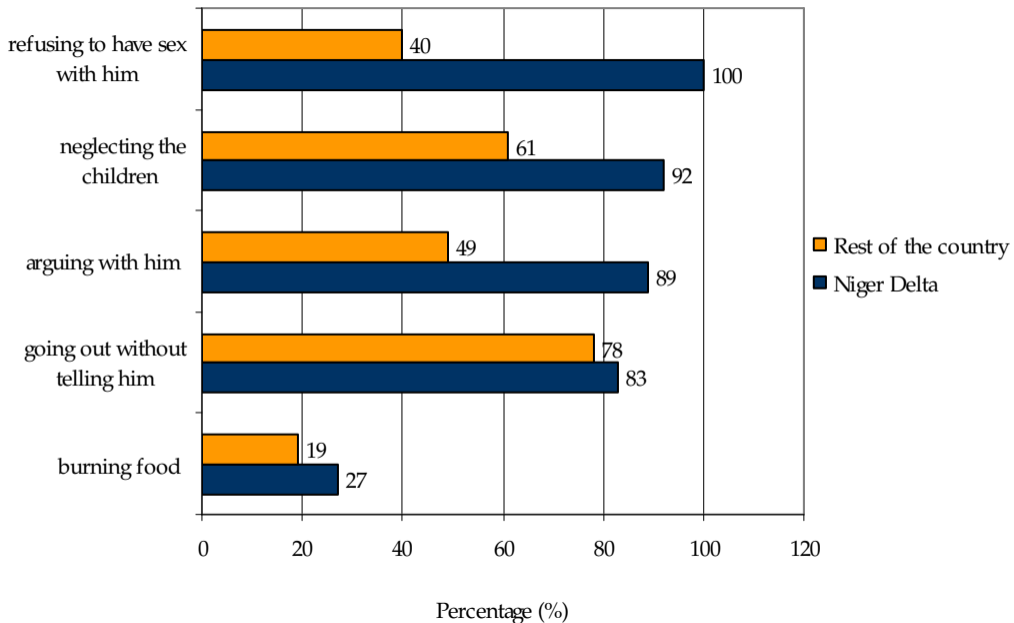

Supplement: MOESM1 [file 9537450]
